# Supplementary material for: Domain Mapping of Chondroitin/Dermatan Sulfate Glycosaminoglycans Enables Structural Characterization of Proteoglycans
Source: PubMed Central journal article supplement (PMC8724862; doi:10.1016/j.mcpro.2021.100074), 2021-03-20
Supplement: mmc2.pdf [file mmc2.pdf]

**Table S1.** Experimental and theoretical masses, and accuracy of precursor ions.

| Structure | Composition                 | Experimental mass*               | Theoretical mass | z | Acc. (ppm)         | Figure reference  | Reference file #MS <sup>2</sup> scan no.              |
|-----------|-----------------------------|----------------------------------|------------------|---|--------------------|-------------------|-------------------------------------------------------|
|           | Δdp2S1                      | 458.0598<br>458.0599             | 458.0610         | 1 | -2.6<br>-2.4       | 2B<br>S10C        | 200626_08 #2628<br>200626_16 #2692                    |
|           | Δdp2S2                      | 268.5056                         | 268.5053         | 2 | 1.3                | 2C                | 200214_14 #6633                                       |
|           | Δdp4S2                      | 458.0608                         | 458.0610         | 2 | -0.4               | S10D              | 200626_16 #5699                                       |
|           | Δdp4S3                      | 562.6158                         | 562.6153         | 2 | 0.9                | 3D                | 200214_17 #10278                                      |
|           | Δdp6S0                      | 567.6596<br>567.6606<br>567.6612 | 567.6600         | 2 | -0.6<br>1.1<br>2.2 | S6A<br>S6C<br>S6E | 200603_28 #3202<br>200603_94 #3269<br>200214_14 #5992 |
|           | Δdp8S0                      | 757.2163<br>757.2158<br>757.2169 | 757.2157         | 2 | 0.8<br>0.1<br>1.6  | S6B<br>S6D<br>S6F | 200603_28 #3906<br>200603_94 #4533<br>200214_14 #7762 |
|           | dp5S3                       | 673.1607                         | 673.1603         | 2 | 0.6                | S10E              | 200214_20 #9471                                       |
|           | ΔL6S1Ser                    | 588.1340                         | 588.1329         | 2 | 2.0                | 4B<br>S11D        | 200130_36 #5639                                       |
|           | ΔL6S2Ser                    | 628.1121                         | 628.1113         | 2 | 1.4                | 4C<br>S11G        | 200130_36 #7844                                       |
|           | ΔL4S0Ser-Gly-Glu-Glu (EEGS) | 516.1523                         | 516.1521         | 2 | 0.5                | 4E<br>S12B        | 200214_17 #5234                                       |
|           | ΔL12S4Ser                   | 850.8217                         | 850.8211         | 3 | 0.7                | 4F                | 200626_24 #10626                                      |
|           | L19S8Ser                    | 1154.2891                        | 1154.2908        | 4 | -1.5               | 5B                | 200626_31 #13267                                      |
|           | ΔL6S1                       | 544.6180                         | 544.6169         | 2 | 2.1                | S11B              | 200214_04 #5747                                       |
|           | ΔL6S2                       | 584.5966                         | 584.5953         | 2 | 2.3                | S11C              | 200214_14 #8053                                       |
|           | ΔL6S1Ser-Gly (GS)           | 616.6448                         | 616.6436         | 2 | 1.9                | S11E              | 200130_36 #5578                                       |
|           | ΔL6S2Ser-Gly (GS)           | 623.6524                         | 623.6514         | 2 | 1.6                | S11F              | 200130_36 #5773                                       |
|           | ΔL6S1Ser-Ala                | 656.6230                         | 656.6220         | 2 | 1.5                | S11H              | 200130_36 #7684                                       |
|           | ΔL6S2Ser-Ala                | 663.6310                         | 663.6298         | 2 | 1.8                | S11I              | 200130_36 #7940                                       |
|           | ΔL6S1SA1Ser                 | 733.6813                         | 733.6806         | 2 | 1.0                | S11J              | 200214_14 #7711                                       |
|           | ΔL6S1SA1Ser-Gly (GS)        | 762.1917                         | 762.1913         | 2 | 0.5                | S11K              | 200214_14 #7558                                       |
|           | ΔL6S1SA1Ser-Ala             | 769.1995                         | 769.1991         | 2 | 0.5                | S11L              | 200214_14 #7801                                       |
|           | ΔL4S0Ser-Gly-Glu (EGS)      | 451.6309                         | 451.6308         | 2 | 0.3                | S12A              | 200214_17 #3906                                       |
|           | ΔL4S1Ser-Gly-Glu (EGS)      | 491.6093                         | 491.6092         | 2 | 0.3                | S12C              | 200214_17 #5586                                       |
|           | ΔL4S1Ser-Gly-Glu-Glu (EEGS) | 556.1306                         | 556.1305         | 2 | 0.3                | S12D              | 200214_17 #6931                                       |
|           | ΔL4S0SA1Ser-Ala             | 539.6652                         | 539.6650         | 2 | 0.5                | S12E              | 200214_17 #4166                                       |

|                                                                                   |                      |          |          |   |     |      |                 |
|-----------------------------------------------------------------------------------|----------------------|----------|----------|---|-----|------|-----------------|
|  | ΔL4S1SA1Ser-Ala      | 579.6435 | 579.6434 | 2 | 0.3 | S12F | 200214_17 #5907 |
|  | ΔL4S1SA1Ser          | 544.1254 | 544.1248 | 2 | 1.1 | S12G | 200214_17 #5833 |
|  | ΔL4S1SA1Ser-Gly (GS) | 572.6363 | 572.6356 | 2 | 1.3 | S12H | 200214_17 #5731 |
|  | dGMP                 | 346.0566 | 346.0558 | 1 | 2.3 | S3A  | 200214_14 #4035 |
|  | dAMP                 | 330.0612 | 330.0609 | 1 | 0.9 | S3B  | 200214_14 #4399 |
|  | GMP                  | 362.0511 | 362.0507 | 1 | 1.1 | S3C  | 200130_36 #4032 |
|  | AMP                  | 346.0565 | 346.0558 | 1 | 2.0 | S3D  | 200130_36 #4399 |
|  | CG                   | 587.1266 | 587.1257 | 1 | 1.5 | S3E  | 200130_36 #4016 |
|  | CGUC                 | 638.5772 | 638.5757 | 2 | 2.4 | S3F  | 200130_36 #8595 |

\*Depending on the spectrum scan number, the two last decimals differ slightly. This explains any differences between the presented decimal values in the tables and figures. Experimental monoisotopic masses were taken directly prior to the reference MS<sup>2</sup> scan number
