# Supplementary material for: Domain Mapping of Chondroitin/Dermatan Sulfate Glycosaminoglycans Enables Structural Characterization of Proteoglycans
Source: PubMed Central journal article supplement (PMC8724862; doi:10.1016/j.mcpro.2021.100074), 2021-03-20
Supplement: mmc3.pdf [file mmc3.pdf]

**Table S2.** Annotations, experimental and theoretical masses, and accuracies of fragment ions included in Fig. 2, 4, 5, S6, S11, and S12. Fragment ions previously annotated by us are not included<sup>1</sup>.

| Proposed structure                             | Experimental mass | Theoretical mass | z | Accuracy (ppm) | Figure reference |
|------------------------------------------------|-------------------|------------------|---|----------------|------------------|
| +CO<br>S                                       | 328.0345          | 328.0344         | 1 | -0.3           | 2C               |
| +CO<br>+Ac<br>S                                | 370.0446          | 370.0450         | 1 | 1.1            | 2C               |
| -CO <sub>2</sub><br>S                          | 396.0625          | 396.0606         | 1 | -4.8           | 2C               |
| +Ac<br>S<br>-H <sub>2</sub> O                  | 411.5855          | 411.58495        | 2 | -1.3           | 4B               |
| <sup>14</sup> A<br>S<br>-H <sub>2</sub> O      | 505.6012          | 505.60095        | 2 | -0.5           | 4B               |
| S                                              | 560.1845          | 560.1832         | 1 | -2.3           | 4B               |
| -CO<br>-H <sub>2</sub> O<br>S                  | 674.2158          | 674.2149         | 1 | -1.3           | 4B               |
| S                                              | 796.1461          | 796.1459         | 1 | -0.3           | 4B               |
| S                                              | 553.1088          | 553.1080         | 1 | -1.4           | 4C               |
| S<br>S                                         | 640.1407          | 640.1400         | 1 | -1.1           | 4C               |
| EGS<br>-CO <sub>2</sub><br>-2H <sub>2</sub> O  | 210.0887          | 210.0883         | 1 | -1.9           | 4E               |
| EEGS<br>-CO <sub>2</sub><br>-2H <sub>2</sub> O | 339.1313          | 339.1309         | 1 | -1.2           | 4E               |
| EEGS<br>-CO <sub>2</sub><br>-H <sub>2</sub> O  | 357.142           | 357.1415         | 1 | -1.4           | 4E               |
| EEGS<br>-H <sub>2</sub> O                      | 401.1318          | 401.1313         | 1 | -1.2           | 4E               |
| EEGS                                           | 437.1379          | 437.14125        | 2 | 7.7            | 4E               |
| -CO <sub>2</sub><br>EEGS                       | 494.1574          | 494.1571         | 2 | -0.6           | 4E               |
| EEGS                                           | 713.2371          | 713.2370         | 1 | -0.1           | 4E               |
| -H <sub>2</sub> O<br>EEGS                      | 857.2803          | 857.2792         | 1 | -1.3           | 4E               |
| EEGS                                           | 875.2907          | 875.2898         | 1 | -1.0           | 4E               |
| S<br>S<br>S                                    | 738.6541          | 738.65625        | 2 | 2.9            | 4F               |



|                                                                                         |           |           |   |      |      |
|-----------------------------------------------------------------------------------------|-----------|-----------|---|------|------|
| SA<br>-H <sub>2</sub> O                                                                 | 157.0622  | 157.0618  | 1 | -2.5 | S10F |
|  SA    | 631.2216  | 631.2203  | 1 | -2.1 | S10F |
| -CO <sub>2</sub><br>-H <sub>2</sub> O                                                   | 745.2521  | 745.2520  | 1 | -0.1 | S10H |
|  SA    | 807.2527  | 807.2524  | 1 | -0.4 | S10I |
|  GS    | 697.1615  | 697.1614  | 1 | -0.1 | S10J |
|  SA    | 711.1774  | 711.1771  | 1 | -0.4 | S10J |
|                                                                                         | 355.0851  | 355.0849  | 2 | -0.6 | S11F |
|  S     | 851.2794  | 851.2786  | 1 | -0.9 | S10J |
| -CO <sub>2</sub><br>-H <sub>2</sub> O                                                   | 965.3118  | 965.3103  | 1 | -1.6 | S10J |
|  S     |           |           |   |      |      |
| -CO <sub>2</sub><br>-H <sub>2</sub> O                                                   | 731.2375  | 731.2363  | 1 | -1.6 | S10K |
|  S     |           |           |   |      |      |
| -CO <sub>2</sub><br>-H <sub>2</sub> O                                                   | 1022.3348 | 1022.3317 | 1 | -3.0 | S10K |
|  GS  |           |           |   |      |      |
|  GS  | 1154.3395 | 1154.3376 | 1 | -1.6 | S10K |
|  SA  |           |           |   |      |      |
| -H <sub>2</sub> O                                                                       | 789.2427  | 789.2418  | 1 | -1.1 | S10L |
|  SA  |           |           |   |      |      |
| -CO <sub>2</sub>                                                                        | 878.3282  | 878.3259  | 1 | -2.6 | S10L |
|  SA  |           |           |   |      |      |
|  SA  | 1010.3214 | 1010.3318 | 1 | 10.3 | S10L |
|  SA  |           |           |   |      |      |
|  SA  | 1168.3544 | 1168.3533 | 1 | -0.9 | S10L |
|  SA  |           |           |   |      |      |
| EGS<br>-CO <sub>2</sub> -H <sub>2</sub> O                                               | 228.0996  | 228.0989  | 1 | -3.1 | S11A |
| EGS<br>-H <sub>2</sub> O                                                                | 272.089   | 272.0887  | 1 | -1.1 | S11A |
|  EGS | 291.5931  | 291.5935  | 2 | 1.5  | S11A |
|                                                                                         | 584.1943  | 584.1944  | 1 | 0.2  | S11A |
|  EGS | 337.0776  | 337.0776  | 1 | 0.0  | S11A |
|  EGS | 728.2357  | 728.2366  | 1 | 1.2  | S11A |

|                                                                               |                      |                       |        |              |      |
|-------------------------------------------------------------------------------|----------------------|-----------------------|--------|--------------|------|
| $^{14}\text{A}$<br>◇<br>●S<br>★<br>-H <sub>2</sub> O                          | 316.0456             | 316.0452              | 2      | -1.3         | S11C |
| +Ac<br>●S<br>★                                                                | 595.119              | 595.1186              | 1      | -0.7         | S11C |
| ◇<br>●S<br>★                                                                  | 711.1296             | 711.1295              | 1      | -0.1         | S11C |
| ◇<br>●S<br>●S<br>★                                                            | 798.1581             | 798.1615              | 1      | 4.3          | S11C |
| E-H <sub>2</sub> O                                                            | 128.0356             | 128.0353              | 1      | -2.3         | S11D |
| EG<br>-H <sub>2</sub> O                                                       | 185.0569             | 185.0567              | 1      | -1.1         | S11D |
| EEG<br>-H <sub>2</sub> O                                                      | 314.0997             | 314.0993              | 1      | -1.3         | S11D |
| +Ac<br>●S<br>●S<br>★<br>EEGS                                                  | 498.1252             | 498.12495             | 2      | -0.5         | S11D |
| ★<br>SA                                                                       | 307.1147             | 307.1147              | 1      | 0.0          | S11E |
| ●<br>★<br>SA                                                                  | 469.1678             | 469.1675              | 1      | -0.6         | S11E |
| -CO <sub>2</sub><br>◇<br>●<br>◇<br>★<br>SA                                    | 517.6699             | 517.67005             | 2      | 0.3          | S11E |
| -H <sub>2</sub> O<br>●<br>●<br>★<br>SA                                        | 613.2095             | 613.2097              | 1      | 0.3          | S11E |
| +Ac<br>+CO<br>●<br>●<br>★<br>SA                                               | 701.2256             | 701.2258              | 1      | 0.3          | S11E |
| ◇<br>●<br>◇<br>★<br>SA                                                        | 922.3057             | 922.3157              | 1      | 10.8         | S11E |
| +Ac<br>●S<br>●S<br>★<br>SA                                                    | 376.0903             | 376.0902              | 2      | -0.3         | S11F |
| ◇<br>●S<br>●S<br>★<br>SA                                                      | 434.0957             | 434.09565             | 2      | -0.1         | S11F |
| +Ac<br>-CO <sub>2</sub><br>●S<br>◇<br>★<br>SA                                 | 499.643              | 499.643               | 2      | 0.0          | S11F |
| ◇<br>●S                                                                       | 208.0138<br>417.0347 | 208.01355<br>417.0344 | 2<br>1 | -1.2         | S11G |
| ◇<br>●S<br>●S<br>-H <sub>2</sub> O                                            | 280.0349             | 280.03465             | 2      | -0.9<br>-0.7 | S11G |
| $^{24}\text{A}$<br>◇<br>●S<br>●S<br>★                                         | 310.0456             | 310.04525             | 2      | -1.1         | S11G |
| -CO <sub>2</sub><br>$^{14}\text{A}$<br>◇<br>●S<br>◇<br>★<br>-H <sub>2</sub> O | 439.5982             | 439.598               | 2      | -0.5         | S11G |
| +Ac<br>●S<br>●S<br>★<br>S                                                     | 682.1507             | 682.1506              | 1      | -0.1         | S11G |
| +Ac<br>●S<br>●S<br>★<br>GS                                                    | 739.1721             | 739.1720              | 1      | -0.1         | S11H |
| ◇<br>●S<br>●S<br>★<br>GS                                                      | 855.1846             | 855.1829              | 1      | -2.0         | S11H |

## Reference

- 1 Persson, A., Vorontsov, E., Larson, G. & Nilsson, J. Glycosaminoglycan Domain Mapping of Cellular Chondroitin/Dermatan Sulfates. *Sci Rep.* **10**, 3506, doi:10.1038/s41598-020-60526-0 (2020).
